# Supplementary material for: Serum Metabolomic and Lipoprotein Profiling of Pancreatic Ductal Adenocarcinoma Patients of African Ancestry
Source: MDPI journal article supplement (doi:10.3390/metabo11100663), 2021-09-28
Supplement: s1 [file s1]

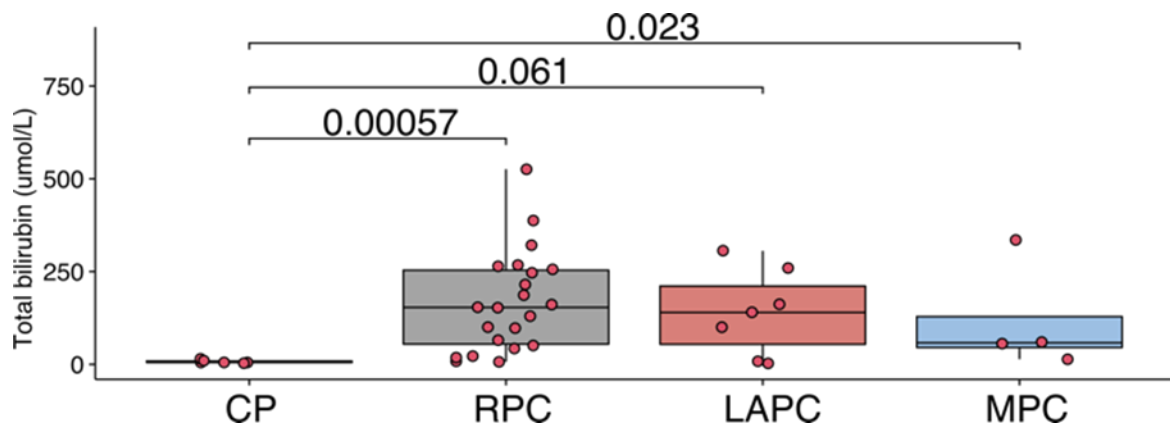

**Figure S1: Boxplot of Total Bilirubin across all the groups with p-values.** Showing statistically significant higher values of Total Bilirubin in PDAC groups RPC, LAPC and MPC compared to CP using Wilcoxon Rank Sum test. Higher values of bilirubin may be due by bile obstruction, which might cause damage to the liver. CP: Chronic pancreatitis; RPC: Resectable Pancreatic Ductal Adenocarcinoma; LAPC: Locally Advanced Pancreatic Ductal Adenocarcinoma; MPC: Metastatic Pancreatic Ductal Adenocarcinoma

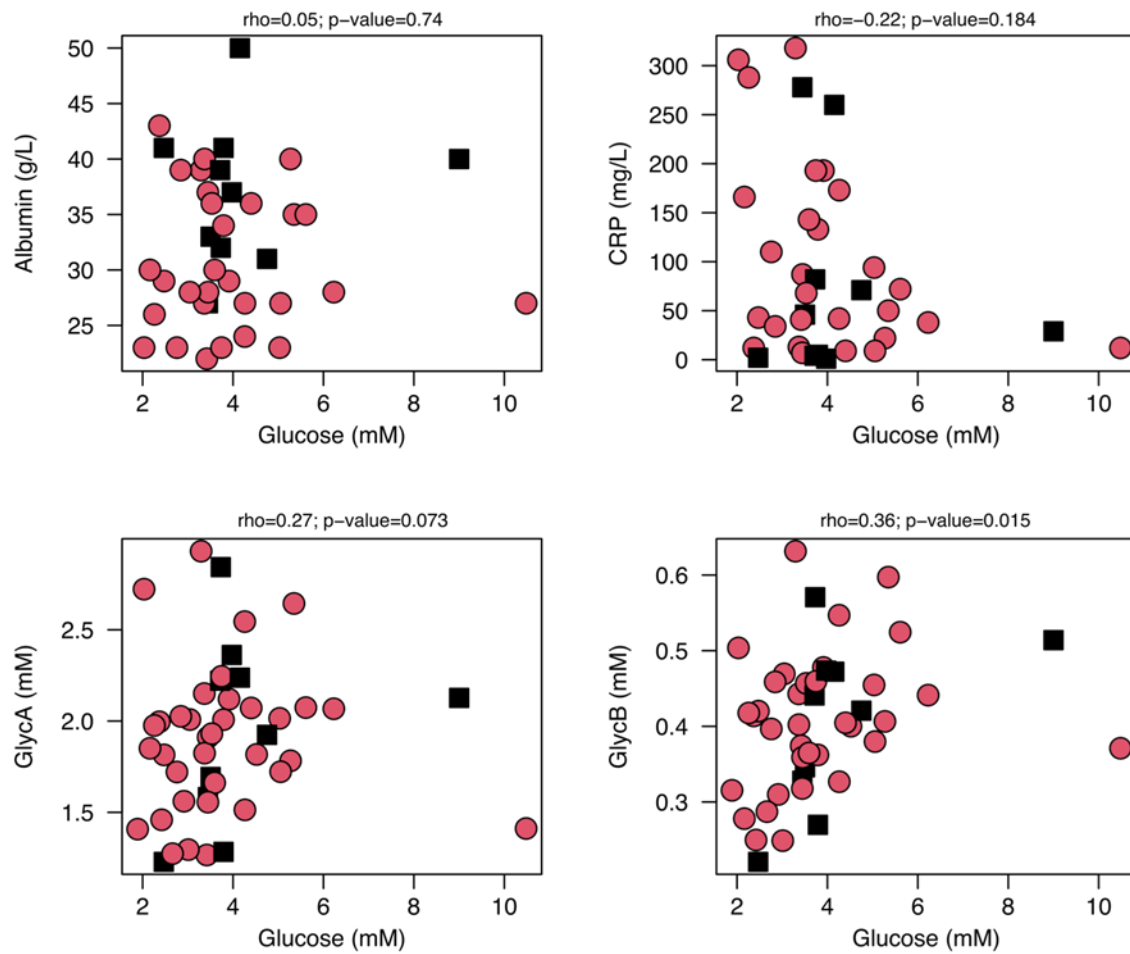

**Figure S2: Correlation of Glucose and Inflammatory markers.** GlycB has a positive correlation with glucose. Elevated glucose levels detected in the blood could be because of chronic inflammation on decreasing insulin secretion and sensitivity. Black-square boxes represent PDAC patients with T2DM. There was no direct correlation of diabetes with the markers. The outlier could be sample collected from a patient with high blood sugar levels after feeding. T2DM: Type 2 Diabetes, PDAC: Pancreatic Ductal Adenocarcinoma.



**Table S2:** Blood chemistry of the Pancreatic Ductal Adenocarcinoma and Chronic Pancreatitis patient groups.

| Features                     | CP<br>median [IQR] | RPC<br>median [IQR] | LAPC<br>median [IQR] | MPC<br>median [IQR] | p-value | FDR   |
|------------------------------|--------------------|---------------------|----------------------|---------------------|---------|-------|
| Sodium (mmol/L)              | 138 [135.5 139.75] | 137 [135 140]       | 135.5 [129.5 137.5]  | 139.5 [138.5 141]   | 0.295   | 0.889 |
| Potassium (mmol/L)           | 4.05 [3.7 4.4]     | 3.7 [3.4 4.1]       | 3.55 [3.275 4.075]   | 3.7 [3.125 4.3]     | 0.659   | 0.889 |
| Chloride (mmol/L)            | 97.5 [97 101.75]   | 96 [93 97]          | 93.5 [89.75 96.5]    | 90.5 [88.75 93]     | 0.127   | 0.889 |
| Bicarbonate (mmol/L)         | 19.5 [18.25 20.75] | 23 [17 25]          | 20 [19.75 21.5]      | 24.5 [18.5 30.25]   | 0.800   | 0.889 |
| Anion gap (mmol/L)           | 24.5 [20.75 26.75] | 26 [19 30]          | 23 [22 26.25]        | 29.5 [25.75 33]     | 0.445   | 0.889 |
| Calcium (mmol/L)             | 2.26 [2.198 2.382] | 2.2 [2.11 2.31]     | 2.105 [1.978 2.235]  | 2.135 [2.128 2.148] | 0.403   | 0.889 |
| Magnesium (mmol/L)           | 0.865 [0.83 0.885] | 0.79 [0.68 0.9]     | 0.77 [0.682 0.885]   | 0.78 [0.72 1.16]    | 0.800   | 0.889 |
| Inorganic Phosphate (mmol/L) | 1.18 [1.13 1.32]   | 1.06 [0.96 1.2]     | 1.085 [0.995 1.278]  | 1.14 [1.098 1.367]  | 0.477   | 0.889 |
| Urea (mmol/L)                | 4 [3.45 5.45]      | 4 [2.2 5.5]         | 3.5 [2.075 7.125]    | 4.35 [3.05 6.325]   | 0.945   | 0.645 |
| Creatinine (μmol/L)          | 90 [64.25 130]     | 71 [58 95]          | 64.5 [48 79.75]      | 76.5 [72.75 80.25]  | 0.585   | 0.889 |

CP: chronic pancreatitis; RPC: Resectable Pancreatic Ductal Adenocarcinoma; LAPC: Locally Advanced Pancreatic Ductal Adenocarcinoma; MPC: Metastatic Pancreatic Ductal Adenocarcinoma

**Table S3** List of the quantified signal and their relative assignment and multiplicity.

| Metabolite                 | Assignment<br>(multiplicity) | matrix | Metabolite                                     | Assignment<br>(multiplicity) | matrix         |
|----------------------------|------------------------------|--------|------------------------------------------------|------------------------------|----------------|
| Formate                    | 8.45 (s)                     | serum  | cholesterol-derived 1                          | 0.64 (s)                     | lipid extracts |
| Unknown signal at 8.12 ppm | 8.12 (d)                     | serum  | cholesterol-derived 2                          | 0.65 (s)                     | lipid extracts |
| Unknown signal at 8.07 ppm | 8.07 (d)                     | serum  | cholesterol-derived 3                          | 0.66 (s)                     | lipid extracts |
| Phenylalanine              | 7.42 (m)                     | serum  | cholesterol-derived 4                          | 0.66 (s)                     | lipid extracts |
| Tyrosine                   | 7.19 (m)                     | serum  | cholesterol-derived 5                          | 0.67 (s)                     | lipid extracts |
| Unknown signal at 7.14 ppm | 7.14 (m)                     | serum  | free cholesterol                               | 0.68 (s)                     | lipid extracts |
| Histidine                  | 7.05 (d)                     | serum  | esterified cholesterol                         | 0.68 (s)                     | lipid extracts |
| Glucose                    | 5.23 (d)                     | serum  | cholesterol-derived 6                          | 0.69 (s)                     | lipid extracts |
| Mannose                    | 5.18 (d)                     | serum  | cholesterol-derived 7                          | 0.70 (s)                     | lipid extracts |
| Unknown signal at 5.15 ppm | 5.15 (d)                     | serum  | cholesterol-derived 8                          | 0.70 (s)                     | lipid extracts |
| Unknown signal at 5.09 ppm | 5.09 (d)                     | serum  | cholesterol-derived 9                          | 0.71 (s)                     | lipid extracts |
| Unknown signal at 5.01 ppm | 5.01 (d)                     | serum  | saturated and omega-9 fatty acid               | 0.87 (t)                     | lipid extracts |
| Ascorbate                  | 4.50 (d)                     | serum  | omega-7 fatty acid                             | 0.87 (t)                     | lipid extracts |
| Threonine                  | 4.24 (m)                     | serum  | omega-6 fatty acid                             | 0.88 (t)                     | lipid extracts |
| Lactate                    | 4.11 (q)                     | serum  | Unknown signal at 0.91 ppm                     | 0.98 (d)                     | lipid extracts |
| Creatinine                 | 4.05 (s)                     | serum  | omega-3 fatty acid                             | 0.99 (t)                     | lipid extracts |
| Creatine                   | 3.92 (s)                     | serum  | monounsaturated fatty acid                     | 2.01 (q)                     | lipid extracts |
| Glycine                    | 3.55 (s)                     | serum  | polyunsaturated fatty acid 1 (except linoleic) | 2.80 (t)                     | lipid extracts |
| Methanol                   | 3.35 (s)                     | serum  | polyunsaturated fatty acid 2 (except linoleic) | 2.84 (d)                     | lipid extracts |
| Unknown signal at 2.55 ppm | 2.55 (s)                     | serum  | linoleic acid                                  | 2.76 (t)                     | lipid extracts |
| Citrate                    | 2.53 (d)                     | serum  | phosphatidylcholine                            | 3.20 (s)                     | lipid extracts |
| Glutamine                  | 2.45 (m)                     | serum  | sphingomyelin                                  | 3.19 (s)                     | lipid extracts |
| Pyruvate                   | 2.36 (s)                     | serum  | triglyceride                                   | 5.26 (m)                     | lipid extracts |
| Glutamate                  | 2.53 (m)                     | serum  | glycerophospholipid                            | 4.45 (q)                     | lipid extracts |
| Acetoacetate               | 2.22 (s)                     | serum  |                                                |                              |                |
| Acetate                    | 1.91 (s)                     | serum  |                                                |                              |                |
| Alanine                    | 1.47 (d)                     | serum  |                                                |                              |                |
| Unknown signal at 1.45 ppm | 1.45 (d)                     | serum  |                                                |                              |                |
| Unknown signal at 1.43 ppm | 1.43 (d)                     | serum  |                                                |                              |                |
| 3-Hydroxybutyrate          | 1.19 (d)                     | serum  |                                                |                              |                |
| Ethanol                    | 1.17 (t)                     | serum  |                                                |                              |                |
| Unknown signal at 1.16 ppm | 1.16 (d)                     | serum  |                                                |                              |                |
| Unknown signal at 1.14 ppm | 1.14 (d)                     | serum  |                                                |                              |                |
| Unknown signal at 1.11 ppm | 1.11 (d)                     | serum  |                                                |                              |                |
| Unknown signal at 1.06 ppm | 1.06 (d)                     | serum  |                                                |                              |                |
| Valine                     | 1.04 (d)                     | serum  |                                                |                              |                |
| Isoleucine                 | 1.00 (d)                     | serum  |                                                |                              |                |
| Leucine                    | 0.95 (dd)                    | serum  |                                                |                              |                |
| 2-Hydroxybutyrate          | 0.89 (t)                     | serum  |                                                |                              |                |
| Protein NH                 | 10.00-6.00                   | serum  |                                                |                              |                |
| Unsaturated lipid -CH=CH-  | 5.50-5.10                    | serum  |                                                |                              |                |
| Lipid alpha-CH2            | 2.25-2.15                    | serum  |                                                |                              |                |
| Cholesterol                | 0.70-0.60                    | serum  |                                                |                              |                |
| Lipid =CH-CH2-CH=          | 2.85-2.65                    | serum  |                                                |                              |                |
| Glycerol phospholipid      | 4.08-4.03                    | serum  |                                                |                              |                |
| Phospholipid               | 3.68-3.62                    | serum  |                                                |                              |                |
| Lipid beta-CH2             | 1.65-1.40                    | serum  |                                                |                              |                |
| Lipid CH2                  | 1.40-1.10                    | serum  |                                                |                              |                |
| Lipid CH3                  | 1.10-1.08                    | serum  |                                                |                              |                |
| GlycB                      | 2.07 (m)                     | serum  |                                                |                              |                |
| GlycA                      | 2.03 (m)                     | serum  |                                                |                              |                |

**Table S4:** Correlation of concentration of metabolites with the stages of Pancreatic Ductal Adenocarcinoma.

| Feature                    | rho   | p-value | FDR   |
|----------------------------|-------|---------|-------|
| Formate                    | 0.22  | 0.151   | 0.513 |
| Unknown signal at 8.12 ppm | -0.01 | 0.941   | 0.995 |
| Unknown signal at 8.07 ppm | 0.3   | 0.043   | 0.235 |
| Phenylalanine              | 0.32  | 0.030   | 0.235 |
| Tyrosine                   | 0.01  | 0.960   | 0.995 |
| Unknown signal at 7.14 ppm | 0.07  | 0.632   | 0.849 |
| Histidine                  | -0.03 | 0.841   | 0.933 |
| Glucose                    | 0.13  | 0.406   | 0.767 |
| Mannose                    | 0.2   | 0.181   | 0.543 |
| Unknown signal at 5.15 ppm | 0.18  | 0.232   | 0.564 |
| Unknown signal at 5.09 ppm | 0.05  | 0.727   | 0.905 |
| Unknown signal at 5.01 ppm | 0.12  | 0.439   | 0.793 |
| Ascorbate                  | -0.47 | 0.001   | 0.021 |
| Threonine                  | 0.16  | 0.282   | 0.600 |
| Lactate                    | 0.5   | <0.001  | 0.012 |
| Creatinine                 | -0.18 | 0.248   | 0.574 |
| Creatine                   | 0.08  | 0.582   | 0.811 |
| Glycine                    | 0.52  | <0.001  | 0.012 |
| Methanol                   | -0.19 | 0.202   | 0.543 |
| Unknown signal at 2.55 ppm | -0.09 | 0.542   | 0.811 |
| Citrate                    | 0     | 0.997   | 0.997 |
| Glutamine                  | -0.11 | 0.482   | 0.793 |
| Pyruvate                   | 0.28  | 0.060   | 0.278 |
| Glutamate                  | 0.24  | 0.115   | 0.450 |
| Acetoacetate               | 0.1   | 0.529   | 0.811 |
| Acetate                    | 0.19  | 0.200   | 0.543 |
| Alanine                    | -0.03 | 0.822   | 0.932 |
| Unknown signal at 1.45 ppm | 0.32  | 0.032   | 0.235 |
| Unknown signal at 1.43 ppm | 0.18  | 0.226   | 0.564 |
| 3-Hydroxybutyrate          | 0.11  | 0.467   | 0.793 |
| Ethanol                    | 0.04  | 0.804   | 0.932 |
| Unknown signal at 1.16 ppm | 0.15  | 0.339   | 0.692 |
| Unknown signal at 1.14 ppm | -0.31 | 0.035   | 0.235 |
| Unknown signal at 1.11 ppm | 0.31  | 0.041   | 0.235 |
| Unknown signal at 1.06 ppm | 0.04  | 0.800   | 0.932 |
| Valine                     | -0.2  | 0.182   | 0.543 |
| Isoleucine                 | 0.06  | 0.702   | 0.895 |
| Leucine                    | -0.26 | 0.083   | 0.354 |
| 2-Hydroxybutyrate          | 0.3   | 0.046   | 0.235 |
| Protein NH                 | -0.42 | 0.005   | 0.058 |
| Unsaturated lipid -CH=CH-  | -0.08 | 0.589   | 0.811 |
| Lipid alpha-CH2            | 0.17  | 0.271   | 0.600 |
| Cholesterol                | 0.02  | 0.912   | 0.989 |
| Lipid =CH-CH2-CH=          | -0.13 | 0.402   | 0.767 |
| Glycerol phospholipid      | 0.07  | 0.658   | 0.861 |
| Phospholipid               | 0     | 0.976   | 0.995 |
| Lipid beta-CH2             | -0.09 | 0.561   | 0.811 |
| Lipid CH2                  | 0.05  | 0.755   | 0.916 |
| Lipid CH3                  | -0.1  | 0.500   | 0.796 |
| GlycB                      | 0.23  | 0.129   | 0.471 |
| GlycA                      | 0.11  | 0.453   | 0.793 |

Rho: spearman's correlation coefficient measures the strength of association between two variables; FDR: false discovery rate

**Table S5:** Correlation of concentration of lipid extracts with the stages of Pancreatic Ductal Adenocarcinoma.

| Features                                        | rho   | p-value | FDR   |
|-------------------------------------------------|-------|---------|-------|
| cholesterol-derived 1                           | 0.32  | 0.047   | 0.154 |
| cholesterol-derived 2                           | 0.37  | 0.018   | 0.089 |
| cholesterol-derived 3                           | 0.24  | 0.133   | 0.195 |
| cholesterol-derived 4                           | 0.37  | 0.019   | 0.089 |
| cholesterol-derived 5                           | -0.29 | 0.065   | 0.154 |
| free cholesterol                                | 0.28  | 0.084   | 0.159 |
| esterified cholesterol                          | 0.09  | 0.587   | 0.587 |
| cholesterol-derived 6                           | 0.38  | 0.016   | 0.089 |
| cholesterol-derived 7                           | -0.16 | 0.313   | 0.327 |
| cholesterol-derived 8                           | 0.38  | 0.014   | 0.089 |
| cholesterol-derived 9                           | -0.33 | 0.037   | 0.148 |
| saturated and omega-9 fatty acid                | 0.3   | 0.062   | 0.154 |
| omega-7 fatty acid                              | 0.37  | 0.017   | 0.089 |
| omega-6 fatty acid                              | 0.24  | 0.138   | 0.195 |
| Unknown signal at 0.91 ppm                      | -0.29 | 0.071   | 0.154 |
| omega-3 fatty acid                              | 0.27  | 0.086   | 0.159 |
| monounsaturated fatty acid                      | 0.26  | 0.110   | 0.180 |
| polyunsaturated fatty acid 1 (except linoleate) | 0.18  | 0.269   | 0.293 |
| polyunsaturated fatty acid 2 (except linoleate) | 0.23  | 0.149   | 0.199 |
| Linoleate                                       | 0.21  | 0.194   | 0.233 |
| Phosphatidylcholine                             | 0.2   | 0.206   | 0.235 |
| Sphingomyelin                                   | 0.3   | 0.065   | 0.154 |
| Triglyceride                                    | 0.21  | 0.189   | 0.233 |
| Glycerophospholipid                             | 0.25  | 0.112   | 0.180 |

Rho: spearman's correlation coefficient measures the strength of association between two variables; FDR: false discovery rate

**Table S6:** Selected metabolites ratios and their catalysing enzymes.

| Ratio                          | Catalysing enzymes                                                     |
|--------------------------------|------------------------------------------------------------------------|
| Glucose/Lactate                | Phosphofructokinase                                                    |
| Pyruvate/Lactate               | Lactate dehydrogenase                                                  |
| Threonine/Glycine              | Threonine dehydrogenase<br>2-amino-3-ketobutyrate<br>coenzyme A ligase |
| Glutamine/Glutamate            | Glutamine synthetase                                                   |
| 3-hydroxybutyrate/acetoacetate | 3-hydroxybutyrate<br>dehydrogenase                                     |
| Glutamate/Alanine              | Alanine aminotransferase                                               |



**Table S7:** Correlation of metabolites ratios with the stages of Pancreatic Ductal Adenocarcinoma.

| Feature                        | rho   | p-value | FDR   |
|--------------------------------|-------|---------|-------|
| Glucose/Lactate                | -0.19 | 0.212   | 0.424 |
| Pyruvate/Lactate               | -0.14 | 0.360   | 0.599 |
| Threonine/Glycine              | -0.09 | 0.540   | 0.674 |
| Glutamine/Glutamate            | -0.26 | 0.089   | 0.222 |
| 3-Hydroxybutyrate/Acetoacetate | -0.05 | 0.767   | 0.767 |
| Glutamate/Alanine              | 0.27  | 0.073   | 0.222 |

Rho: spearman's correlation coefficient measures the strength of association between two variables; FDR: false discovery rate

**Table S8:** Correlation of concentration of lipoproteins with the stages of Pancreatic Ductal Adenocarcinoma.

| Feature                                | rho   | p-value | FDR   |
|----------------------------------------|-------|---------|-------|
| VLDL cholesterol (nmol/L)              | -0.07 | 0.667   | 0.754 |
| IDL cholesterol (nmol/L)               | 0.32  | 0.031   | 0.089 |
| LDL cholesterol (nmol/L)               | 0.22  | 0.151   | 0.230 |
| HDL cholesterol (nmol/L)               | -0.38 | 0.011   | 0.046 |
| VLDL triglyceride (nmol/L)             | -0.03 | 0.840   | 0.910 |
| IDL triglyceride (nmol/L)              | 0.28  | 0.060   | 0.139 |
| LDL triglyceride (nmol/L)              | 0.3   | 0.043   | 0.112 |
| HDL triglyceride (nmol/L)              | -0.08 | 0.607   | 0.717 |
| VLDL particle (nmol/L)                 | 0.01  | 0.964   | 0.964 |
| Large VLDL particle(nmol/L)            | -0.13 | 0.404   | 0.500 |
| Medium VLDL particle (nmol/L)          | -0.23 | 0.121   | 0.211 |
| Small VLDL particle(nmol/L)            | 0.02  | 0.916   | 0.953 |
| LDL particle (nmol/L)                  | 0.26  | 0.080   | 0.161 |
| Large LDL particle (nmol/L)            | 0.21  | 0.174   | 0.251 |
| Medium LDL particle (nmol/L)           | 0.28  | 0.064   | 0.139 |
| Small LDL particle (nmol/L)            | 0.15  | 0.333   | 0.450 |
| HDL particle (mol/L)                   | -0.39 | 0.008   | 0.046 |
| Large HDL particle (mol/L)             | -0.35 | 0.019   | 0.072 |
| Medium HDL particle (mol/L)            | -0.39 | 0.008   | 0.046 |
| Small HDL particle (mol/L)             | -0.39 | 0.009   | 0.046 |
| VLDL size (nm)                         | -0.22 | 0.139   | 0.225 |
| LDL size (nm)                          | 0.14  | 0.346   | 0.450 |
| HDL size (nm)                          | 0.34  | 0.024   | 0.077 |
| Non-HDL particle (nmol/L)              | 0.26  | 0.087   | 0.162 |
| Total particle / HDL particle (nmol/L) | 0.39  | 0.008   | 0.046 |
| LDL particle / HDL particle (nmol/L)   | 0.39  | 0.008   | 0.046 |

Rho: spearman's correlation coefficient measures the strength of association between two variables; FDR: false discovery rate

**Table S9:** Correlation of metabolites with survival time.

| Features                   | p-value | FDR   |
|----------------------------|---------|-------|
| Formate                    | 0.657   | 0.964 |
| Unknown signal at 8.12 ppm | 0.169   | 0.792 |
| Unknown signal at 8.07 ppm | 0.237   | 0.810 |
| Phenylalanine              | 0.615   | 0.964 |
| Tyrosine                   | 0.895   | 0.964 |
| Unknown signal at 7.14 ppm | 0.865   | 0.964 |
| Histidine                  | 0.707   | 0.964 |
| Glucose                    | 0.919   | 0.964 |
| Mannose                    | 0.186   | 0.792 |
| Unknown signal at 5.15 ppm | 0.549   | 0.964 |
| Unknown signal at 5.09 ppm | 0.900   | 0.964 |
| Unknown signal at 5.01 ppm | 0.312   | 0.842 |
| Ascorbate                  | 0.379   | 0.919 |
| Threonine                  | 0.347   | 0.886 |
| Lactate                    | 0.852   | 0.964 |
| Creatinine                 | 0.929   | 0.964 |
| Creatine                   | 0.692   | 0.964 |
| Glycine                    | 0.236   | 0.810 |
| Methanol                   | 0.431   | 0.964 |
| Unknown signal at 2.55 ppm | 0.527   | 0.964 |
| Citrate                    | 0.083   | 0.760 |
| Glutamine                  | 0.500   | 0.964 |
| Pyruvate                   | 0.826   | 0.964 |
| Glutamate                  | 0.591   | 0.964 |
| Acetoacetate               | 0.089   | 0.760 |
| Acetate                    | 0.837   | 0.964 |
| Alanine                    | 0.945   | 0.964 |
| Unknown signal at 1.45 ppm | 0.036   | 0.606 |
| Unknown signal at 1.43 ppm | 0.160   | 0.792 |
| 3-Hydroxybutyrate          | 0.015   | 0.370 |
| Ethanol                    | 0.002   | 0.126 |
| Unknown signal at 1.16 ppm | 0.152   | 0.792 |
| Unknown signal at 1.14 ppm | 0.643   | 0.964 |
| Unknown signal at 1.11 ppm | 0.974   | 0.974 |
| Unknown signal at 1.06 ppm | 0.634   | 0.964 |
| Valine                     | 0.811   | 0.964 |
| Isoleucine                 | 0.512   | 0.964 |
| Leucine                    | 0.699   | 0.964 |
| 2-Hydroxybutyrate          | 0.181   | 0.792 |
| Protein NH                 | 0.791   | 0.964 |
| Unsaturated lipid -CH=CH-  | 0.451   | 0.964 |
| Lipid alpha-CH2            | 0.908   | 0.964 |
| Cholesterol                | 0.059   | 0.752 |
| Lipid =CH-CH2-CH=          | 0.270   | 0.810 |
| Glycerol phospholipid      | 0.570   | 0.964 |
| Phospholipid               | 0.159   | 0.792 |
| Lipid beta-CH2             | 0.560   | 0.964 |
| Lipid CH2                  | 0.763   | 0.964 |
| Lipid CH3                  | 0.314   | 0.842 |
| GlycB                      | 0.269   | 0.810 |
| GlycA                      | 0.257   | 0.810 |

FDR: false discovery rate

**Table S10:** Correlation of the lipid extracts with survival time.

| Feature                                        | p-value | FDR   |
|------------------------------------------------|---------|-------|
| cholesterol-derived 1                          | 0.646   | 0.948 |
| cholesterol-derived 2                          | 0.664   | 0.948 |
| cholesterol-derived 3                          | 0.745   | 0.948 |
| cholesterol-derived 4                          | 0.783   | 0.948 |
| cholesterol-derived 5                          | 0.854   | 0.948 |
| free cholesterol                               | 0.722   | 0.948 |
| esterified cholesterol                         | 0.425   | 0.948 |
| cholesterol-derived 6                          | 0.245   | 0.948 |
| cholesterol-derived 7                          | 0.583   | 0.948 |
| cholesterol-derived 8                          | 0.785   | 0.948 |
| cholesterol-derived 9                          | 0.575   | 0.948 |
| saturated and omega-9 fatty acid               | 0.710   | 0.948 |
| omega-7 fatty acid                             | 0.995   | 0.995 |
| omega-6 fatty acid                             | 0.486   | 0.948 |
| Unknown signal at                              | 0.508   | 0.948 |
| omega-3 fatty acid                             | 0.699   | 0.948 |
| monounsaturated fatty acid                     | 0.882   | 0.948 |
| polyunsaturated fatty acid 1 (except linoleic) | 0.588   | 0.948 |
| polyunsaturated fatty acid 2 (except linoleic) | 0.619   | 0.948 |
| linoleic acid                                  | 0.908   | 0.948 |
| phosphatidylcholine                            | 0.697   | 0.948 |
| sphingomyelin                                  | 0.603   | 0.948 |
| triglyceride                                   | 0.682   | 0.948 |
| glycerophospholipid                            | 0.817   | 0.948 |

FDR: false discovery rate

**Table S11:** Correlation of metabolite concentration ratios with survival time.

| Features                       | p-value | FDR   |
|--------------------------------|---------|-------|
| Glucose/Lactate                | 0.741   | 0.873 |
| Pyruvate/Lactate               | 0.873   | 0.873 |
| Threonine/Glycine              | 0.721   | 0.873 |
| Glutamine/Glutamate            | 0.473   | 0.788 |
| 3-Hydroxybutyrate/Acetoacetate | 0.241   | 0.783 |
| Glutamate/Alanine              | 0.313   | 0.783 |

FDR: false discovery rate

**Table S12:** Correlation of lipoproteins with survival time.

| Features                               | p-value | FDR   |
|----------------------------------------|---------|-------|
| VLDL cholesterol (nmol/L)              | 0.705   | 0.971 |
| IDL cholesterol (nmol/L)               | 0.699   | 0.971 |
| LDL cholesterol (nmol/L)               | 0.174   | 0.971 |
| HDL cholesterol (nmol/L)               | 0.666   | 0.971 |
| VLDL triglyceride (nmol/L)             | 0.824   | 0.971 |
| IDL triglyceride (nmol/L)              | 0.718   | 0.971 |
| LDL triglyceride (nmol/L)              | 0.623   | 0.971 |
| HDL triglyceride (nmol/L)              | 0.467   | 0.971 |
| VLDL particle (nmol/L)                 | 0.996   | 0.996 |
| Large VLDL particle(nmol/L)            | 0.771   | 0.971 |
| Medium VLDL particle (nmol/L)          | 0.581   | 0.971 |
| Small VLDL particle(nmol/L)            | 0.935   | 0.973 |
| LDL particle (nmol/L)                  | 0.250   | 0.971 |
| Large LDL particle (nmol/L)            | 0.324   | 0.971 |
| Medium LDL particle (nmol/L)           | 0.379   | 0.971 |
| Small LDL particle (nmol/L)            | 0.136   | 0.971 |
| HDL particle (mol/L)                   | 0.815   | 0.971 |
| Large HDL particle (mol/L)             | 0.738   | 0.971 |
| Medium HDL particle (mol/L)            | 0.884   | 0.971 |
| Small HDL particle (mol/L)             | 0.627   | 0.971 |
| VLDL size (nm)                         | 0.776   | 0.971 |
| LDL size (nm)                          | 0.871   | 0.971 |
| HDL size (nm)                          | 0.404   | 0.971 |
| Non-HDL particle (nmol/L)              | 0.271   | 0.971 |
| Total particle / HDL particle (nmol/L) | 0.866   | 0.971 |
| LDL particle / HDL particle (nmol/L)   | 0.896   | 0.971 |

FDR: false discovery rate

**Table S13:** Comparison of the Full Blood Count of N versus AB Clusters.

| Features                | N, median [IQR]      | AB, median [IQR]     | log change | p-value | FDR   |
|-------------------------|----------------------|----------------------|------------|---------|-------|
| Haematocrit             | 0.354 [0.312 0.392]  | 0.28 [0.261 0.306]   | -0.32      | 0.003   | 0.015 |
| White cell count (/L^9) | 7.315 [5.772 10.12]  | 10.8 [8.27 15.04]    | 0.73       | 0.011   | 0.040 |
| Haemaglobin (g/DL)      | 11.2 [10.2 12.95]    | 9.15 [8.725 9.85]    | -0.29      | 0.002   | 0.015 |
| Platelet count (/L^9)   | 352.5 [250.75 450.5] | 410 [351.5 460.75]   | 0.25       | 0.137   | 0.250 |
| Prothrombin time (Sec)  | 13.3 [12.4 14.8]     | 14.2 [12.8 14.475]   | 0.05       | 0.719   | 0.798 |
| INR                     | 1.08 [0.99 1.19]     | 1.115 [1.032 1.168]  | 0.06       | 0.639   | 0.798 |
| MCV (fL)                | 92.3 [87.8 96.5]     | 89.35 [87.625 95.65] | 0          | 0.826   | 0.826 |
| MCH (pg)                | 30.2 [28.1 31.4]     | 29.8 [28.825 32.1]   | 0.03       | 0.725   | 0.798 |
| MCHC (g/dl)             | 32.7 [31.3 33.4]     | 33.5 [32.2 34.15]    | 0.03       | 0.131   | 0.250 |
| MPV (fL)                | 10.5 [9.475 10.8]    | 10.75 [9.825 11.2]   | 0.05       | 0.172   | 0.271 |
| Red cell count (/L^12)  | 3.77 [3.42 4.54]     | 2.985 [2.75 3.473]   | -0.12      | 0.020   | 0.055 |

IQR: Interquartile range; FDR: false discovery rate

**Table S14:** Comparison of the Blood chemistry of N versus AB components.

| Feature                      | N, median [IQR]  | AB, median [IQR]    | log change | p-value | FDR   |
|------------------------------|------------------|---------------------|------------|---------|-------|
| Sodium (mmol/L)              | 138 [135 140]    | 136.5 [130.5 138.5] | -0.04      | 0.063   | 0.260 |
| Potassium (mmol/L)           | 3.8 [3.4 4.5]    | 3.65 [3.35 3.875]   | -0.08      | 0.403   | 0.448 |
| Chloride (mmol/L)            | 97 [93 99]       | 93 [91.25 96]       | -0.04      | 0.078   | 0.260 |
| Bicarbonate (mmol/L)         | 21 [19 24]       | 18.5 [17 24]        | -0.14      | 0.186   | 0.321 |
| Anion gap (mmol/L)           | 23 [20 27]       | 27.5 [21.25 30.75]  | 0.07       | 0.395   | 0.448 |
| Calcium(mmol/L)              | 2.2 [2.13 2.32]  | 2.14 [1.997 2.223]  | -0.14      | 0.107   | 0.267 |
| Magnesium (mmol/L)           | 0.84 [0.79 0.92] | 0.72 [0.673 0.753]  | -0.29      | 0.019   | 0.190 |
| Inorganic Phosphate (mmol/L) | 1.13 [1.03 1.26] | 1.02 [0.938 1.198]  | -0.16      | 0.192   | 0.321 |
| Urea (mmol/L)                | 4.3 [2.9 5.6]    | 3.25 [2 8.175]      | 0.17       | 0.747   | 0.747 |
| Creatinine (μmol/L)          | 75 [63 97]       | 62.5 [52.75 88.75]  | -0.22      | 0.266   | 0.380 |

IQR: Interquartile range; FDR: false discovery rate



**Table S15:** Comparison of the Liver function tests of N versus AB components.

| Feature                          | N, median [IQR] | AB, median [IQR]     | log change | p-val | FDR   |
|----------------------------------|-----------------|----------------------|------------|-------|-------|
| Total Protein (g/L)              | 68 [59 76]      | 58 [53 64]           | -0.23      | 0.018 | 0.029 |
| Albumin (g/L)                    | 36 [28 40]      | 27.5 [26.25 29.75]   | -0.34      | 0.002 | 0.012 |
| Total Bilirubin (μmol/L)         | 43 [8 100]      | 174.5 [143.25 266]   | 1.32       | 0.003 | 0.012 |
| Conjugated Bilirubin (μmol/L)    | 31 [3 97]       | 146 [126.75 241.5]   | 1.34       | 0.006 | 0.016 |
| Alanine transaminase (U/L)       | 28 [18 71]      | 81.5 [23.25 113.25]  | 0.2        | 0.371 | 0.425 |
| Aspartate transaminase (U/L)     | 42 [24 92]      | 115.5 [83 148.5]     | 0.82       | 0.009 | 0.018 |
| Alkaline phosphatase (U/L)       | 288 [103 683]   | 696 [330.25 1378.25] | 0.62       | 0.044 | 0.059 |
| Gamma glutamyl transferase (U/L) | 307 [77 1021]   | 394 [208 926.25]     | -0.04      | 0.650 | 0.650 |

**IQR:** Interquartile range; **FDR:** false discovery rate

**Table S16:** Comparison of the metabolite concentration of N versus AB clusters.

| Features                   | N (mM), median [IQR]     | AB (mM), median [IQR]     | log change | p-value | FDR    |
|----------------------------|--------------------------|---------------------------|------------|---------|--------|
| Formate                    | 0.016 [0.011 0.019]      | 0.019 [0.016 0.022]       | 0.24       | 0.067   | 0.225  |
| Unknown signal at 8.12 ppm | 0 [0 0.007]              | 0 [0 0.023]               | 1.18       | 0.304   | 0.550  |
| Unknown signal at 8.07 ppm | 0 [0 0.005]              | 0 [0 0.01]                | 1          | 0.193   | 0.411  |
| Phenylalanine              | 0.104 [0.069 0.128]      | 0.113 [0.102 0.143]       | 0.14       | 0.080   | 0.225  |
| Tyrosine                   | 0.046 [0.036 0.052]      | 0.04 [0.035 0.054]        | -0.44      | 0.585   | 0.787  |
| Unknown signal at 7.14 ppm | 0.026 [0 0.079]          | 0.034 [0 0.052]           | -0.78      | 0.820   | 0.889  |
| Histidine                  | 0.064 [0.055 0.082]      | 0.074 [0.064 0.078]       | -0.01      | 0.313   | 0.550  |
| Glucose                    | 3.532 [3.029 4.205]      | 3.549 [2.546 4.962]       | 0.13       | 0.952   | 0.980  |
| Mannose                    | 0.037 [0.028 0.051]      | 0.078 [0.037 0.115]       | 1.06       | 0.005   | 0.029  |
| Unknown signal at 5.15 ppm | 0 [0 0]                  | 0 [0 0]                   | 0.23       | 0.607   | 0.787  |
| Unknown signal at 5.09 ppm | 0 [0 0.043]              | 0 [0 0.032]               | -0.67      | 0.696   | 0.845  |
| Unknown signal at 5.01 ppm | 0 [0 0]                  | 0 [0 0]                   | 0.99       | 0.151   | 0.340  |
| Ascorbate                  | 0.01 [0 0.019]           | 0 [0 0.014]               | -0.6       | 0.397   | 0.621  |
| Threonine                  | 0.079 [0.06 0.091]       | 0 [0 0.043]               | -1.47      | 0.002   | 0.013  |
| Lactate                    | 2.253 [2.013 3.114]      | 2.927 [2.62 3.179]        | -0.01      | 0.153   | 0.340  |
| Creatinine                 | 0.057 [0.044 0.073]      | 0.053 [0.031 0.076]       | -0.11      | 0.520   | 0.781  |
| Creatine                   | 0.012 [0.006 0.035]      | 0.002 [0 0.028]           | -0.56      | 0.089   | 0.227  |
| Glycine                    | 0.318 [0.242 0.354]      | 0.311 [0.273 0.353]       | -0.12      | 0.952   | 0.980  |
| Methanol                   | 0.027 [0.018 0.036]      | 0.021 [0.013 0.023]       | -0.55      | 0.054   | 0.219  |
| Unknown signal at 2.55 ppm | 0 [0 0.013]              | 0 [0 0.013]               | -3.27      | 0.589   | 0.787  |
| Citrate                    | 0.081 [0 0.103]          | 0.09 [0 0.123]            | -0.11      | 0.100   | 0.100  |
| Glutamine                  | 0.4 [0.294 0.424]        | 0.268 [0.197 0.294]       | -0.57      | <0.001  | 0.007  |
| Pyruvate                   | 0.058 [0.048 0.072]      | 0.061 [0.047 0.091]       | 0.08       | 0.762   | 0.883  |
| Glutamate                  | 0.19 [0.129 0.272]       | 0.202 [0.155 0.285]       | 0.09       | 0.402   | 0.621  |
| Acetoacetate               | 0.019 [0.016 0.041]      | 0.025 [0.017 0.089]       | 0.09       | 0.301   | 0.550  |
| Acetate                    | 0.024 [0.02 0.033]       | 0.032 [0.026 0.039]       | 0.09       | 0.120   | 0.292  |
| Alanine                    | 0.395 [0.293 0.481]      | 0.341 [0.273 0.35]        | -0.56      | 0.051   | 0.219  |
| Unknown signal at 1.45 ppm | 0.031 [0.024 0.039]      | 0.02 [0 0.049]            | -0.18      | 0.961   | 0.980  |
| Unknown signal at 1.43 ppm | 0 [0 0]                  | 0 [0 0.405]               | 1.85       | 0.005   | 0.029  |
| 3-Hydroxybutyrate          | 0.046 [0.028 0.1]        | 0.05 [0.037 0.451]        | 0.73       | 0.580   | 0.787  |
| Ethanol                    | 0.022 [0 0.083]          | 0 [0 0.084]               | -0.81      | 0.389   | 0.621  |
| Unknown signal at 1.16 ppm | 0.112 [0 0.297]          | 0.168 [0.026 0.337]       | 0.08       | 0.610   | 0.787  |
| Unknown signal at 1.14 ppm | 0.019 [0 0.043]          | 0.016 [0 0.029]           | -0.81      | 0.729   | 0.865  |
| Unknown signal at 1.11 ppm | 0.053 [0.044 0.061]      | 0.061 [0.041 0.073]       | 0.01       | 0.633   | 0.787  |
| Unknown signal at 1.06 ppm | 0.029 [0.021 0.038]      | 0.044 [0.026 0.067]       | 0.24       | 0.057   | 0.219  |
| Valine                     | 0.163 [0.127 0.183]      | 0.139 [0.105 0.161]       | -0.35      | 0.084   | 0.225  |
| Isoleucine                 | 0.041 [0.033 0.053]      | 0.046 [0.042 0.054]       | 0.06       | 0.391   | 0.621  |
| Leucine                    | 0.068 [0.055 0.075]      | 0.05 [0.042 0.067]        | -0.59      | 0.021   | 0.108  |
| 2-Hydroxybutyrate          | 0 [0 0.021]              | 0.009 [0 0.048]           | 1.07       | 0.312   | 0.550  |
| Protein NH                 | 144.358 [121.287 154.93] | 105.798 [104.188 112.176] | -0.36      | <0.001  | <0.001 |
| Unsaturated lipid -CH=CH-  | 11.141 [8.332 14.097]    | 14.379 [9.344 19.988]     | 0.36       | 0.080   | 0.225  |
| Lipid alpha-CH2            | 1.863 [1.252 2.379]      | 6.257 [4.119 8.056]       | 1.7        | <0.001  | <0.001 |
| Cholesterol                | 0.825 [0.644 1.064]      | 0.516 [0.27 0.934]        | -0.37      | 0.060   | 0.219  |
| Lipid =CH-CH2-CH=          | 4.954 [3.999 6.138]      | 5.02 [3.569 7.556]        | 0.17       | 0.818   | 0.889  |
| Glycerol phospholipid      | 0.487 [0.243 0.77]       | 1.663 [1.412 2.797]       | 1.94       | <0.001  | <0.001 |
| Phospholipid               | 3.699 [3.478 4.142]      | 3.128 [2.95 3.39]         | -0.24      | <0.001  | 0.005  |
| Lipid beta-CH2             | 7.403 [5.083 8.55]       | 10.095 [6.281 12.356]     | 0.35       | 0.084   | 0.225  |
| Lipid CH2                  | 62.251 [55.441 75.596]   | 111.18 [73.472 140.862]   | 0.71       | <0.001  | 0.001  |
| Lipid CH3                  | 26.385 [21.436 29.909]   | 27.943 [23.387 34.927]    | 0.14       | 0.279   | 0.550  |
| GlycB                      | 0.406 [0.322 0.471]      | 0.407 [0.366 0.436]       | -0.04      | 0.799   | 0.889  |
| GlycA                      | 1.996 [1.535 2.186]      | 1.833 [1.701 2.005]       | -0.03      | 0.619   | 0.787  |

IQR: Interquartile range; FDR: false discovery rate

**Table S17:** Comparison of the lipid extracts concentration of N versus AB clusters.

| Feature                          | N, median [IQR]     | AB, median [IQR]    | log change | p-value | FDR    |
|----------------------------------|---------------------|---------------------|------------|---------|--------|
| cholesterol-derived 1            | 0.661 [0.571 0.791] | 1.46 [1.158 1.675]  | 0.88       | <0.001  | <0.001 |
| cholesterol-derived 2            | 0.613 [0.537 0.75]  | 1.484 [1.15 1.745]  | 0.97       | <0.001  | <0.001 |
| cholesterol-derived 3            | 0.805 [0.694 0.893] | 1.273 [1.118 1.327] | 0.48       | <0.001  | <0.001 |
| cholesterol-derived 4            | 0.639 [0.569 0.778] | 1.424 [1.185 1.641] | 0.85       | <0.001  | <0.001 |
| cholesterol-derived 5            | 1.299 [0.909 1.667] | 0.271 [0.241 0.385] | -2.14      | <0.001  | <0.001 |
| free cholesterol                 | 0.193 [0.055 0.271] | 2.095 [0.96 3.516]  | 2.52       | <0.001  | <0.001 |
| esterified cholesterol           | 0.93 [0.572 1.271]  | 1.073 [0.343 1.437] | -0.03      | 0.977   | 0.977  |
| cholesterol-derived 6            | 0.608 [0.526 0.828] | 1.54 [0.835 2.05]   | 0.99       | 0.002   | 0.002  |
| cholesterol-derived 7            | 1.069 [0.907 1.394] | 0.713 [0.604 0.784] | -0.67      | <0.001  | <0.001 |
| cholesterol-derived 8            | 0.607 [0.547 0.822] | 1.468 [1.162 1.69]  | 0.9        | <0.001  | <0.001 |
| cholesterol-derived 9            | 1.127 [0.747 1.75]  | 0.333 [0.31 0.401]  | -1.87      | <0.001  | <0.001 |
| saturated and omega-9 fatty acid | 0.667 [0.538 0.833] | 1.443 [1.223 1.999] | 1.07       | <0.001  | <0.001 |
| omega-7 fatty acid               | 0.909 [0.78 1.043]  | 1.126 [0.982 1.221] | 0.36       | 0.002   | 0.002  |
| omega-6 fatty acid               | 0.583 [0.367 1.078] | 1.448 [1.256 1.851] | 1.07       | <0.001  | <0.001 |
| Unknown signal at 0.91 ppm       | 0 [0 0]             | 0 [0 0]             | -          | 0.230   | 0.240  |
| omega-3 fatty acid               | 0.626 [0.397 0.798] | 1.748 [1.159 1.915] | 1.14       | <0.001  | <0.001 |
| monounsaturated fatty acid       | 0.38 [0.193 0.656]  | 1.898 [1.386 2.441] | 2.06       | <0.001  | <0.001 |
| Polyunsaturated fatty acid 1     | 0.552 [0.342 0.832] | 1.63 [1.211 2.031]  | 1.46       | <0.001  | <0.001 |
| Polyunsaturated fatty acid 2     | 0.536 [0.334 0.812] | 1.736 [1.327 2.057] | 1.47       | <0.001  | <0.001 |
| linoleic acid                    | 0.476 [0.228 0.756] | 1.582 [1.234 2.454] | 1.53       | <0.001  | <0.001 |
| phosphatidylcholine              | 0.533 [0.419 0.669] | 1.624 [1.108 2.288] | 1.52       | <0.001  | <0.001 |
| sphingomyelin                    | 0.594 [0.499 0.833] | 1.205 [0.928 1.719] | 0.97       | <0.001  | <0.001 |
| triglyceride                     | 0.59 [0.474 0.838]  | 1.643 [1.413 2.011] | 1.41       | <0.001  | <0.001 |
| glycerophospholipid              | 0.494 [0.393 0.614] | 1.704 [1.26 2.384]  | 1.65       | <0.001  | <0.001 |

IQR: Interquartile range; FDR: false discovery rate

**Table S18:** Comparison of the metabolite concentration ratios of N versus AB clusters.

| Feature                        | N, median [IQR]     | AB, median [IQR]    | log change | p-value | FDR   |
|--------------------------------|---------------------|---------------------|------------|---------|-------|
| Glucose/Pyruvate               | 1.483 [1.254 1.769] | 1.201 [0.975 1.774] | 0.10       | 0.459   | 0.689 |
| Pyruvate/Lactate               | 0.023 [0.019 0.031] | 0.027 [0.017 0.029] | -0.05      | 0.799   | 0.912 |
| Threonine/Glycine              | 0.248 [0.207 0.31]  | 0 [0 0.152]         | -1.51      | 0.004   | 0.019 |
| Glutamine/Glutamate            | 1.966 [1.23 3.538]  | 1.378 [0.704 2.113] | -0.80      | 0.029   | 0.048 |
| 3-Hydroxybutyrate/Acetoacetate | 2.566 [1.258 3.729] | 2.415 [0.865 4.247] | 0.11       | 0.912   | 0.912 |
| Glutamate/Alanine              | 0.52 [0.358 0.606]  | 0.634 [0.516 0.976] | 0.59       | 0.013   | 0.031 |

IQR: Interquartile range; FDR: false discovery rate

**Table S19:** Comparison of the lipoprotein profile for N versus AB clusters.

| Feature                                | N, median [IQR]           | AB, median [IQR]            | log change | p-value | FDR    |
|----------------------------------------|---------------------------|-----------------------------|------------|---------|--------|
| VLDL cholesterol (nmol/L)              | 17.81 [11.205 24.26]      | 24.08 [16.92 34.872]        | 0.58       | 0.025   | 0.030  |
| IDL cholesterol (nmol/L)               | 17.31 [10.345 21.475]     | 73.96 [52.33 82.738]        | 1.91       | <0.001  | <0.001 |
| LDL cholesterol (nmol/L)               | 108.36 [87.245 130.24]    | 146.94 [119.998 165.042]    | 0.38       | 0.008   | 0.010  |
| HDL cholesterol (nmol/L)               | 36.31 [28.005 50.43]      | 1 [1 1]                     | -4.99      | <0.001  | <0.001 |
| VLDL triglyceride (nmol/L)             | 73.84 [47.195 92.89]      | 108.86 [82.815 141.52]      | 0.77       | <0.001  | 0.001  |
| IDL triglyceride (nmol/L)              | 15.4 [11.215 18.165]      | 50.75 [35.712 57.97]        | 1.55       | <0.001  | <0.001 |
| LDL triglyceride (nmol/L)              | 18.96 [11.86 30.375]      | 72.13 [48.785 85.205]       | 1.59       | <0.001  | <0.001 |
| HDL triglyceride (nmol/L)              | 17.76 [15.12 22.85]       | 24.345 [13.485 30.7]        | 0.25       | 0.459   | 0.459  |
| VLDL particle (nmol/L)                 | 50.87 [33.49 65.585]      | 79.76 [56.802 104.332]      | 0.75       | <0.001  | 0.001  |
| Large VLDL particle(nmol/L)            | 1.38 [0.875 1.61]         | 1.445 [1.375 1.7]           | 0.39       | 0.095   | 0.103  |
| Medium VLDL particle (nmol/L)          | 5.53 [4.03 7.4]           | 5.465 [5.07 7.022]          | 0.31       | 0.440   | 0.458  |
| Small VLDL particle(nmol/L)            | 43.15 [29.4 56.13]        | 74.645 [50.73 96.23]        | 0.8        | <0.001  | <0.001 |
| LDL particle (nmol/L)                  | 1113.73 [848.825 1331.92] | 1745.03 [1458.052 2184.075] | 0.66       | <0.001  | <0.001 |
| Large LDL particle (nmol/L)            | 180.92 [131.475 215.42]   | 268.655 [194.603 301.295]   | 0.45       | 0.002   | <0.001 |
| Medium LDL particle (nmol/L)           | 349.05 [194.215 521.08]   | 868.56 [666.858 1136.122]   | 1.12       | <0.001  | <0.001 |
| Small LDL particle (nmol/L)            | 577.17 [480.125 661.975]  | 634.715 [559.785 805.162]   | 0.29       | 0.084   | 0.095  |
| HDL particle (mol/L)                   | 18.54 [14.905 25.96]      | 4.855 [2.812 5.335]         | -2.13      | <0.001  | <0.001 |
| Large HDL particle (mol/L)             | 0.28 [0.245 0.305]        | 0.175 [0.105 0.223]         | -0.78      | <0.001  | <0.001 |
| Medium HDL particle (mol/L)            | 10.55 [9.295 11.395]      | 5.735 [3.708 6.16]          | -1         | <0.001  | <0.001 |
| Small HDL particle (mol/L)             | 8.87 [3.175 15.98]        | 0 [0 0]                     | -5.7       | <0.001  | <0.001 |
| VLDL size (nm)                         | 42.2 [42.175 42.22]       | 42.16 [42.13 42.18]         | 0          | 0.001   | 0.002  |
| LDL size (nm)                          | 21.27 [21.135 21.46]      | 21.595 [21.505 21.655]      | 0.02       | <0.001  | <0.001 |
| HDL size (nm)                          | 8.5 [8.34 8.9]            | 9.55 [9.47 9.645]           | 0.15       | <0.001  | <0.001 |
| Non-HDL particle (nmol/L)              | 1130.02 [847.865 1358.64] | 1838.72 [1510.072 2274.648] | 0.68       | <0.001  | <0.001 |
| Total particle / HDL particle (nmol/L) | 48.14 [35.675 98.015]     | 437.875 [354.01 539.432]    | 2.64       | <0.001  | <0.001 |
| LDL particle / HDL particle (nmol/L)   | 43.99 [34.045 95.405]     | 414.975 [333.365 517.24]    | 2.63       | <0.001  | <0.001 |

IQR: Interquartile range; FDR: false discovery rate

**Table S20:** Correlation of metabolites with GlycA, GlycB, CRP, and Albumin intensity value.

| Feature                    | GlycA |         |        | GlycB |         |        | CRP   |         |       | Albumin |         |        |
|----------------------------|-------|---------|--------|-------|---------|--------|-------|---------|-------|---------|---------|--------|
|                            | rho   | p-value | FDR    | rho   | p-value | FDR    | rho   | p-value | FDR   | rho     | p-value | FDR    |
| Formate                    | 0.2   | 0.186   | 0.389  | 0.27  | 0.072   | 0.334  | 0.08  | 0.656   | 0.910 | -0.27   | 0.101   | 0.477  |
| Unknown signal at 8.12 ppm | -0.27 | 0.068   | 0.233  | -0.23 | 0.122   | 0.367  | -0.08 | 0.636   | 0.910 | -0.14   | 0.387   | 0.658  |
| Unknown signal at 8.07 ppm | -0.26 | 0.079   | 0.233  | -0.16 | 0.304   | 0.583  | 0.03  | 0.847   | 0.910 | -0.19   | 0.237   | 0.526  |
| Phenylalanine              | 0.2   | 0.190   | 0.389  | 0.29  | 0.055   | 0.280  | 0.29  | 0.079   | 0.808 | -0.21   | 0.197   | 0.523  |
| Tyrosine                   | -0.33 | 0.027   | 0.175  | -0.26 | 0.079   | 0.335  | 0.06  | 0.727   | 0.910 | 0.06    | 0.702   | 0.904  |
| Unknown signal at 7.14 ppm | 0.34  | 0.021   | 0.157  | 0.26  | 0.090   | 0.346  | 0.08  | 0.622   | 0.910 | -0.26   | 0.115   | 0.477  |
| Histidine                  | -0.56 | <0.001  | 0.001  | -0.49 | <0.001  | 0.008  | -0.16 | 0.358   | 0.829 | 0.07    | 0.662   | 0.904  |
| Glucose                    | 0.27  | 0.727   | 0.233  | 0.36  | 0.015   | 0.095  | -0.22 | 0.184   | 0.829 | 0.05    | 0.740   | 0.904  |
| Mannose                    | 0.34  | 0.021   | 0.157  | 0.36  | 0.115   | 0.095  | 0.04  | 0.832   | 0.910 | -0.21   | 0.192   | 0.523  |
| Unknown signal at 5.15 ppm | -0.25 | 0.096   | 0.233  | -0.14 | 0.358   | 0.593  | -0.06 | 0.738   | 0.910 | -0.18   | 0.269   | 0.553  |
| Unknown signal at 5.09 ppm | 0.26  | 0.086   | 0.233  | 0.18  | 0.233   | 0.583  | -0.01 | 0.950   | 0.969 | -0.29   | 0.076   | 0.477  |
| Unknown signal at 5.01 ppm | -0.28 | 0.061   | 0.233  | -0.16 | 0.286   | 0.583  | 0.07  | 0.692   | 0.910 | -0.24   | 0.140   | 0.477  |
| Ascorbate                  | -0.25 | 0.095   | 0.233  | -0.25 | 0.099   | 0.346  | -0.05 | 0.749   | 0.910 | -0.04   | 0.806   | 0.909  |
| Threonine                  | 0.04  | 0.807   | 0.895  | 0.02  | 0.878   | 0.904  | -0.16 | 0.344   | 0.829 | 0.3     | 0.064   | 0.477  |
| Lactate                    | 0.32  | 0.031   | 0.176  | 0.38  | 0.009   | 0.082  | 0.4   | 0.014   | 0.559 | -0.2    | 0.218   | 0.523  |
| Creatinine                 | -0.1  | 0.506   | 0.842  | -0.06 | 0.693   | 0.803  | -0.06 | 0.711   | 0.910 | -0.04   | 0.820   | 0.909  |
| Creatine                   | -0.06 | 0.675   | 0.842  | -0.03 | 0.862   | 0.904  | 0.2   | 0.228   | 0.829 | 0       | 0.993   | 0.993  |
| Glycine                    | 0.07  | 0.643   | 0.842  | 0.13  | 0.397   | 0.610  | 0.16  | 0.356   | 0.829 | -0.22   | 0.180   | 0.523  |
| Methanol                   | -0.03 | 0.848   | 0.920  | -0.18 | 0.237   | 0.583  | 0.04  | 0.830   | 0.910 | 0.35    | 0.028   | 0.283  |
| Unknown signal at 2.55 ppm | 0.08  | 0.619   | 0.842  | -0.05 | 0.768   | 0.851  | -0.16 | 0.341   | 0.829 | 0.22    | 0.169   | 0.523  |
| Citrate                    | -0.18 | 0.237   | 0.465  | -0.06 | 0.710   | 0.805  | -0.08 | 0.642   | 0.910 | -0.09   | 0.599   | 0.872  |
| Glutamine                  | -0.06 | 0.694   | 0.842  | -0.16 | 0.300   | 0.583  | -0.25 | 0.137   | 0.829 | 0.05    | 0.773   | 0.909  |
| Pyruvate                   | 0.15  | 0.340   | 0.598  | 0.24  | 0.109   | 0.346  | 0.19  | 0.270   | 0.829 | -0.24   | 0.135   | 0.477  |
| Glutamate                  | 0.02  | 0.879   | 0.934  | 0.07  | 0.645   | 0.783  | 0.09  | 0.595   | 0.910 | -0.06   | 0.733   | 0.904  |
| Acetoacetate               | -0.3  | 0.049   | 0.233  | -0.16 | 0.283   | 0.583  | -0.03 | 0.857   | 0.910 | -0.12   | 0.455   | 0.737  |
| Acetate                    | -0.17 | 0.277   | 0.523  | -0.08 | 0.596   | 0.760  | -0.03 | 0.857   | 0.910 | -0.16   | 0.318   | 0.588  |
| Alanine                    | -0.1  | 0.531   | 0.842  | -0.12 | 0.413   | 0.610  | -0.07 | 0.695   | 0.910 | 0.25    | 0.124   | 0.477  |
| Unknown signal at 1.45 ppm | 0.6   | <0.001  | <0.001 | 0.65  | <0.001  | <0.001 | 0.36  | 0.028   | 0.559 | -0.07   | 0.657   | 0.904  |
| Unknown signal at 1.43 ppm | -0.29 | 0.055   | 0.233  | -0.24 | 0.108   | 0.346  | 0.04  | 0.814   | 0.910 | -0.28   | 0.087   | 0.477  |
| 3-Hydroxybutyrate          | -0.06 | 0.677   | 0.842  | 0     | 0.977   | 0.977  | 0.12  | 0.475   | 0.910 | -0.06   | 0.708   | 0.904  |
| Ethanol                    | -0.05 | 0.726   | 0.842  | -0.06 | 0.673   | 0.798  | 0     | 0.998   | 0.998 | -0.11   | 0.493   | 0.761  |
| Unknown signal at 1.16 ppm | 0.06  | 0.713   | 0.842  | 0.12  | 0.430   | 0.610  | -0.16 | 0.347   | 0.829 | -0.16   | 0.320   | 0.588  |
| Unknown signal at 1.14 ppm | 0.22  | 0.149   | 0.330  | 0.15  | 0.338   | 0.593  | 0.17  | 0.321   | 0.829 | 0.12    | 0.462   | 0.737  |
| Unknown signal at 1.11 ppm | 0     | 0.999   | 0.999  | 0.11  | 0.490   | 0.657  | -0.07 | 0.697   | 0.910 | 0       | 0.993   | 0.993  |
| Unknown signal at 1.06 ppm | -0.26 | 0.090   | 0.233  | -0.17 | 0.257   | 0.583  | 0.12  | 0.480   | 0.910 | -0.16   | 0.323   | 0.588  |
| Valine                     | -0.08 | 0.611   | 0.842  | -0.12 | 0.443   | 0.611  | -0.07 | 0.682   | 0.910 | 0.2     | 0.226   | 0.523  |
| Isoleucine                 | 0.25  | 0.103   | 0.238  | 0.15  | 0.325   | 0.591  | -0.02 | 0.920   | 0.957 | -0.11   | 0.510   | 0.766  |
| Leucine                    | 0.09  | 0.536   | 0.842  | 0.09  | 0.572   | 0.748  | 0.09  | 0.585   | 0.910 | 0.26    | 0.116   | 0.477  |
| 2-Hydroxybutyrate          | -0.28 | 0.065   | 0.233  | -0.14 | 0.361   | 0.593  | 0.12  | 0.465   | 0.910 | -0.03   | 0.880   | 0.954  |
| Protein NH                 | 0.08  | 0.610   | 0.842  | -0.03 | 0.831   | 0.902  | -0.17 | 0.317   | 0.829 | 0.7     | <0.001  | <0.001 |
| Unsaturated lipid -CH=CH-  | -0.09 | 0.567   | 0.842  | -0.16 | 0.286   | 0.583  | 0.23  | 0.174   | 0.829 | 0.04    | 0.786   | 0.909  |
| Lipid alpha-CH2            | -0.09 | 0.567   | 0.842  | -0.13 | 0.397   | 0.610  | 0.33  | 0.043   | 0.559 | -0.43   | 0.006   | 0.157  |
| Cholesterol                | 0.01  | 0.926   | 0.964  | -0.02 | 0.886   | 0.904  | -0.04 | 0.825   | 0.910 | 0.27    | 0.099   | 0.477  |
| Lipid =CH-CH2-CH=          | 0     | 0.986   | 0.999  | -0.08 | 0.621   | 0.773  | 0.2   | 0.230   | 0.829 | 0.18    | 0.271   | 0.553  |
| Glycorol phospholipid      | -0.16 | 0.306   | 0.557  | -0.21 | 0.172   | 0.488  | 0.25  | 0.143   | 0.829 | -0.37   | 0.019   | 0.243  |
| Phospholipid               | 0.42  | 0.004   | 0.041  | 0.41  | 0.005   | 0.055  | 0.06  | 0.703   | 0.910 | 0.4     | 0.012   | 0.198  |
| Lipid beta-CH2             | -0.27 | 0.073   | 0.233  | -0.32 | 0.031   | 0.178  | 0.13  | 0.458   | 0.910 | -0.02   | 0.917   | 0.974  |
| Lipid CH2                  | -0.07 | 0.647   | 0.842  | -0.15 | 0.309   | 0.583  | 0.33  | 0.043   | 0.559 | -0.2    | 0.213   | 0.523  |
| Lipid CH3                  | -0.04 | 0.801   | 0.895  | -0.12 | 0.424   | 0.610  | 0.19  | 0.262   | 0.829 | 0.16    | 0.340   | 0.598  |
| GlycB                      | 0.9   | <0.001  | <0.001 | 1     | 0       | 0      | 0.22  | 0.195   | 0.829 | 0.01    | 0.969   | 0.993  |
| GlycA                      | 1     | 0       | 0      | 0.9   | <0.001  | <0.001 | 0.26  | 0.115   | 0.829 | 0.05    | 0.744   | 0.904  |

Rho: spearman's correlation coefficient measures the strength of association between two variables; FDR: false discovery rate

**Table S21:** Correlation of lipid extracts with GlycA, GlycB, CRP, and Albumin intensity value.

| Feature                          | GlycA |         |       | GlycB |         |       | CRP   |         |       | Albumin |         |       |
|----------------------------------|-------|---------|-------|-------|---------|-------|-------|---------|-------|---------|---------|-------|
|                                  | rho   | p-value | FDR   | rho   | p-value | FDR   | rho   | p-value | FDR   | rho     | p-value | FDR   |
| cholesterol-derived 1            | -0.17 | 0.296   | 0.666 | -0.11 | 0.502   | 0.788 | 0.35  | 0.045   | 0.123 | -0.54   | <0.001  | 0.006 |
| cholesterol-derived 2            | -0.16 | 0.328   | 0.666 | -0.1  | 0.525   | 0.788 | 0.37  | 0.035   | 0.123 | -0.53   | 0.001   | 0.006 |
| cholesterol-derived 3            | -0.22 | 0.172   | 0.666 | -0.17 | 0.282   | 0.788 | 0.41  | 0.019   | 0.123 | -0.5    | 0.002   | 0.007 |
| cholesterol-derived 4            | -0.17 | 0.299   | 0.666 | -0.12 | 0.458   | 0.788 | 0.37  | 0.035   | 0.123 | -0.54   | <0.001  | 0.006 |
| cholesterol-derived 5            | 0.11  | 0.511   | 0.756 | 0.05  | 0.775   | 0.829 | -0.35 | 0.044   | 0.123 | 0.51    | 0.002   | 0.006 |
| free cholesterol                 | -0.18 | 0.273   | 0.666 | -0.13 | 0.440   | 0.788 | 0.3   | 0.094   | 0.174 | -0.39   | 0.020   | 0.044 |
| esterified cholesterol           | -0.04 | 0.815   | 0.857 | -0.13 | 0.414   | 0.788 | -0.09 | 0.632   | 0.632 | 0.34    | 0.044   | 0.082 |
| cholesterol-derived 6            | -0.14 | 0.397   | 0.666 | -0.04 | 0.798   | 0.829 | 0.26  | 0.146   | 2.00  | -0.56   | <0.001  | 0.060 |
| cholesterol-derived 7            | -0.06 | 0.701   | 0.857 | -0.04 | 0.829   | 0.829 | -0.35 | 0.046   | 0.123 | 0.27    | 0.117   | 0.165 |
| cholesterol-derived 8            | -0.16 | 0.338   | 0.666 | -0.11 | 0.490   | 0.788 | 0.37  | 0.035   | 0.123 | -0.51   | 0.002   | 0.006 |
| cholesterol-derived 9            | 0.1   | 0.535   | 0.756 | 0.1   | 0.545   | 0.788 | -0.39 | 0.027   | 0.123 | 0.51    | 0.002   | 0.006 |
| saturated and omega-9 fatty acid | -0.23 | 0.156   | 0.666 | -0.14 | 0.372   | 0.788 | 0.32  | 0.071   | 0.172 | -0.44   | 0.009   | 0.022 |
| omega-7 fatty acid               | -0.03 | 0.857   | 0.857 | -0.05 | 0.736   | 0.829 | 0.18  | 0.321   | 0.335 | -0.47   | 0.004   | 0.011 |
| omega-6 fatty acid               | -0.07 | 0.648   | 0.857 | -0.1  | 0.558   | 0.788 | 0.23  | 0.196   | 0.235 | -0.19   | 0.285   | 0.285 |
| Unknown signal at 0.91 ppm       | -0.03 | 0.837   | 0.857 | -0.11 | 0.488   | 0.788 | 0.19  | 0.288   | 0.314 | -0.24   | 0.163   | 0.218 |
| omega-3 fatty acid               | -0.16 | 0.323   | 0.666 | -0.09 | 0.602   | 0.803 | 0.2   | 0.273   | 0.312 | -0.29   | 0.095   | 0.142 |
| monounsaturated fatty acid       | -0.13 | 0.417   | 0.666 | -0.1  | 0.539   | 0.788 | 0.3   | 0.093   | 0.174 | -0.36   | 0.033   | 0.065 |
| Polyunsaturated fatty acid 1     | -0.14 | 0.376   | 0.666 | -0.13 | 0.425   | 0.788 | 0.28  | 0.110   | 0.188 | -0.19   | 0.284   | 0.285 |
| Polyunsaturated fatty acid 2     | -0.19 | 0.245   | 0.666 | -0.16 | 0.326   | 0.788 | 0.26  | 0.150   | 2.00  | -0.21   | 0.233   | 0.266 |
| linoleic acid                    | -0.17 | 0.282   | 0.666 | -0.14 | 0.390   | 0.788 | 0.26  | 0.147   | 2.00  | -0.22   | 0.200   | 0.240 |
| phosphatidylcholine              | -0.19 | 0.237   | 0.666 | -0.16 | 0.316   | 0.788 | 0.27  | 0.130   | 2.00  | -0.32   | 0.063   | 0.100 |
| sphingomyelin                    | -0.05 | 0.753   | 0.857 | -0.04 | 0.814   | 0.829 | 0.3   | 0.091   | 0.174 | -0.19   | 0.274   | 0.285 |
| triglyceride                     | -0.04 | 0.825   | 0.857 | -0.06 | 0.724   | 0.829 | 0.35  | 0.043   | 0.123 | -0.23   | 0.176   | 0.222 |
| glycerophospholipid              | -0.15 | 0.347   | 0.666 | -0.11 | 0.481   | 0.788 | 0.23  | 0.196   | 0.235 | -0.33   | 0.050   | 0.086 |

Rho: spearman's correlation coefficient measures the strength of association between two variables; FDR: false discovery rate

**Table S22:** Correlation of metabolite concentration ratios with GlycA, GlycB, CRP, and Albumin intensity value.

| Feature                       | GlycA |         |       | GlycB |         |       | CRP   |         |       | Albumin |         |       |
|-------------------------------|-------|---------|-------|-------|---------|-------|-------|---------|-------|---------|---------|-------|
|                               | rho   | p-value | FDR   | rho   | p-value | FDR   | rho   | p-value | FDR   | rho     | p-value | FDR   |
| Glucose/Lactate               | -0.03 | 0.867   | 0.960 | 0.01  | 0.970   | 0.970 | -0.44 | 0.006   | 0.004 | 0.19    | 0.256   | 0.683 |
| Pyruvate/Lactate              | -0.08 | 0.622   | 0.778 | -0.07 | 0.631   | 0.631 | -0.09 | 0.585   | 0.585 | -0.08   | 0.644   | 0.683 |
| Threonine/Glycine             | -0.01 | 0.960   | 0.960 | -0.08 | 0.584   | 0.631 | -0.36 | 0.029   | 0.143 | 0.48    | 0.002   | 0.011 |
| Glutamine/Glutamate           | -0.09 | 0.568   | 0.778 | -0.13 | 0.381   | 0.631 | -0.18 | 0.286   | 0.408 | 0.07    | 0.683   | 0.683 |
| 3Hydroxybutyrate/Acetoacetate | 0.12  | 0.431   | 0.778 | 0.12  | 0.450   | 0.631 | 0.24  | 0.160   | 0.399 | -0.07   | 0.661   | 0.683 |
| Glutamate/Alanine             | 0.11  | 0.473   | 0.778 | 0.12  | 0.417   | 0.631 | 0.17  | 0.326   | 0.408 | -0.13   | 0.444   | 0.683 |

Rho: spearman's correlation coefficient measures the strength of association between two variables; FDR: false discovery rate



**Table S23:** Correlation of lipoproteins with GlycA, GlycB, CRP, and Albumin intensity value.

| Lipoproteins                           | GlycA |         |       | GlycB |         |       | CRP   |         |       | Albumin |         |        |
|----------------------------------------|-------|---------|-------|-------|---------|-------|-------|---------|-------|---------|---------|--------|
|                                        | rho   | p-value | FDR   | rho   | p-value | FDR   | rho   | p-value | FDR   | rho     | p-value | FDR    |
| VLDL cholesterol (nmol/L)              | 0.18  | 0.224   | 0.937 | -0.01 | 0.956   | 0.965 | 0.26  | 0.125   | 0.181 | -0.08   | 0.684   | 0.684  |
| IDL cholesterol (nmol/L)               | 0.06  | 0.698   | 0.957 | 0.1   | 0.530   | 0.927 | 0.42  | 0.105   | 0.049 | -0.57   | <0.001  | <0.001 |
| LDL cholesterol (nmol/L)               | -0.16 | 0.305   | 0.937 | -0.08 | 0.582   | 0.927 | 0.2   | 0.233   | 0.275 | -0.16   | 0.316   | 0.342  |
| HDL cholesterol (nmol/L)               | -0.17 | 0.278   | 0.937 | -0.21 | 0.175   | 0.927 | -0.44 | 0.007   | 0.049 | 0.66    | <0.001  | <0.001 |
| VLDL triglyceride (nmol/L)             | 0.03  | 0.854   | 0.957 | -0.12 | 0.431   | 0.927 | 0.28  | 0.938   | 0.163 | -0.21   | 0.202   | 0.250  |
| IDL triglyceride (nmol/L)              | 0.07  | 0.635   | 0.957 | 0.1   | 0.529   | 0.927 | 0.4   | 0.132   | 0.049 | -0.57   | <0.001  | <0.001 |
| LDL triglyceride (nmol/L)              | 0.01  | 0.996   | 0.966 | 0.06  | 0.713   | 0.927 | 0.38  | 0.189   | 0.062 | -0.54   | <0.001  | <0.001 |
| HDL triglyceride (nmol/L)              | 0.02  | 0.920   | 0.957 | -0.01 | 0.956   | 0.965 | 0.11  | 0.522   | 0.565 | -0.22   | 0.185   | 0.240  |
| VLDL particle (nmol/L)                 | 0.07  | 0.653   | 0.957 | -0.07 | 0.630   | 0.927 | 0.3   | 0.762   | 0.142 | -0.23   | 0.158   | 0.229  |
| Large VLDL particle(nmol/L)            | -0.02 | 0.872   | 0.957 | -0.17 | 0.256   | 0.927 | 0.09  | 0.582   | 0.582 | -0.18   | 0.285   | 0.322  |
| Medium VLDL particle (nmol/L)          | 0.17  | 0.251   | 0.937 | -0.08 | 0.618   | 0.927 | 0.17  | 0.319   | 0.361 | 0.12    | 0.452   | 0.470  |
| Small VLDL particle(nmol/L)            | 0.06  | 0.711   | 0.957 | -0.09 | 0.568   | 0.927 | 0.31  | 0.637   | 0.127 | -0.25   | 0.129   | 0.197  |
| LDL particle (nmol/L)                  | -0.16 | 0.279   | 0.937 | -0.09 | 0.575   | 0.927 | 0.24  | 0.149   | 0.185 | -0.29   | 0.760   | 0.124  |
| Large LDL particle (nmol/L)            | -0.03 | 0.856   | 0.957 | -0.04 | 0.776   | 0.961 | 0.33  | 0.473   | 0.112 | -0.18   | 0.268   | 0.317  |
| Medium LDL particle (nmol/L)           | -0.09 | 0.553   | 0.957 | -0.02 | 0.901   | 0.965 | 0.27  | 0.104   | 0.169 | -0.31   | 0.541   | 0.108  |
| Small LDL particle (nmol/L)            | -0.35 | 0.020   | 0.524 | -0.26 | 0.904   | 0.927 | 0.1   | 0.568   | 0.582 | -0.22   | 0.791   | 0.240  |
| HDL particle (mol/L)                   | -0.16 | 0.283   | 0.937 | -0.19 | 0.209   | 0.927 | -0.42 | 0.944   | 0.049 | 0.67    | <0.001  | <0.001 |
| Large HDL particle (mol/L)             | 0.09  | 0.547   | 0.957 | -0.04 | 0.813   | 0.961 | -0.26 | 0.121   | 0.181 | 0.49    | <0.001  | <0.001 |
| Medium HDL particle (mol/L)            | -0.05 | 0.760   | 0.957 | -0.11 | 0.456   | 0.927 | -0.31 | 0.625   | 0.127 | 0.37    | <0.001  | <0.001 |
| Small HDL particle (mol/L)             | -0.13 | 0.411   | 0.957 | -0.17 | 0.267   | 0.927 | -0.42 | 0.984   | 0.049 | 0.72    | <0.001  | <0.001 |
| VLDL size (nm)                         | 0.06  | 0.680   | 0.957 | 0.01  | 0.948   | 0.965 | -0.25 | 0.133   | 0.181 | 0.4     | <0.001  | <0.001 |
| LDL size (nm)                          | 0.27  | 0.068   | 0.887 | 0.21  | 0.161   | 0.927 | 0.36  | 0.290   | 0.076 | -0.29   | 0.713   | 0.124  |
| HDL size (nm)                          | 0.09  | 0.559   | 0.957 | 0.13  | 0.398   | 0.927 | 0.36  | 0.286   | 0.076 | -0.69   | <0.001  | <0.001 |
| Non-HDL particle (nmol/L)              | -0.15 | 0.324   | 0.957 | -0.08 | 0.587   | 0.927 | 0.25  | 0.143   | 0.185 | -0.3    | 0.634   | 0.118  |
| Total particle / HDL particle (nmol/L) | 0.02  | 0.896   | 0.957 | 0.06  | 0.678   | 0.927 | 0.42  | 0.877   | 0.049 | -0.59   | <0.001  | <0.001 |
| LDL particle / HDL particle (nmol/L)   | 0.02  | 0.908   | 0.957 | 0.07  | 0.659   | 0.927 | 0.41  | 0.113   | 0.049 | -0.58   | <0.001  | <0.001 |

Rho: spearman's correlation coefficient measures the strength of association between two variables; FDR: false discovery rate
